# Supplementary material for: Effects of Co-Inoculating Saccharomyces spp. with Bradyrhizobium japonicum on Atmospheric Nitrogen Fixation in Soybeans (Glycine max (L.))
Source: MDPI journal article supplement (doi:10.3390/plants12030681), 2023-02-03
Supplement: s1 [file s1]

## Supplementary information

**Table S1.** Descriptors of soybeans development stages [99,100].

| Physiological stage | Description                                                                         |
|---------------------|-------------------------------------------------------------------------------------|
| V <sub>(n)</sub>    | Vegetative phases of growth, with (n) denoting the number of nodes on the main stem |
| R <sub>1</sub>      | Early flowering                                                                     |
| R <sub>3.5</sub>    | Late flowering                                                                      |
| R <sub>3</sub>      | Early pod-fill; very small pods                                                     |
| R <sub>4-5</sub>    | Mid-pod-fill; larger pods with beans starting to develop                            |
| R <sub>6</sub>      | Late pod-fill; pods containing full-sized green beans                               |
| R <sub>7</sub>      | Physiological maturity; pods yellowing and about 50% leaves yellow                  |
| R <sub>8</sub>      | Harvest maturity; pods brown                                                        |

**Table S2.** Physiochemical characteristics of a representative composite soil sample used.

| Properties                                  | Value      |
|---------------------------------------------|------------|
| Sand (%)                                    | 36.9±0.6   |
| Silt (%)                                    | 25.9±0.4   |
| Clay (%)                                    | 37.7±0.9   |
| Texture grade                               | Clay loam  |
| Humus (%)                                   | 0.63±0.003 |
| pH                                          | 6.3±0.05   |
| EC (dsm <sup>-1</sup> )                     | 0.41±0.002 |
| Available nitrogen (mg kg <sup>-1</sup> )   | 730±0.5    |
| Available phosphorus (mg kg <sup>-1</sup> ) | 2.43±0.005 |
| Potassium (mg kg <sup>-1</sup> )            | 500±2.23   |

**Table S3.** Differences in nodule number per plant and nodule dry weight per plant of soybean at V<sub>5</sub> and R<sub>3.5</sub> physiological stages under different treatments.

| Treatments       | NNP                      |                          | NDWP (mg plant <sup>-1</sup> ) |                             |
|------------------|--------------------------|--------------------------|--------------------------------|-----------------------------|
|                  | V <sub>5</sub>           | R <sub>3.5</sub>         | V <sub>5</sub>                 | R <sub>3.5</sub>            |
| T1               | 13.25 <sup>d</sup> ±1.49 | 14.50 <sup>d</sup> ±1.0  | 210.50 <sup>d</sup> ±22.92     | 201.00 <sup>d</sup> ±52.39  |
| T2               | 26.50 <sup>b</sup> ±0.87 | 33.00 <sup>b</sup> ±1.55 | 430.50 <sup>b</sup> ±14.05     | 536.25 <sup>b</sup> ±19.20  |
| T3               | 21.25 <sup>c</sup> ±1.03 | 28.50 <sup>c</sup> ±1.55 | 344.50 <sup>c</sup> ±16.54     | 496.50 <sup>c</sup> ±13.32  |
| T4               | 19.50 <sup>c</sup> ±1.04 | 27.75 <sup>c</sup> ±1.85 | 336.25 <sup>c</sup> ±16.85     | 468.50 <sup>c</sup> ±13.91  |
| T5               | 36.75 <sup>a</sup> ±1.11 | 78.55 <sup>a</sup> ±2.55 | 591.25 <sup>a</sup> ±18.10     | 1277.25 <sup>a</sup> ±94.90 |
| T6               | 33.75 <sup>a</sup> ±0.75 | 74.30 <sup>a</sup> ±4.5  | 580.73 <sup>a</sup> ±12.14     | 1259.25 <sup>a</sup> ±98.37 |
| Bacteria         | ***                      | ****                     | ****                           | ****                        |
| Yeast            | **                       | ***                      | ***                            | ****                        |
| Bacteria × yeast | ****                     | ****                     | ****                           | ****                        |

Data (means ± SE, n = 5). P-values of two-way ANOVAs followed by different superscripts denotes significant differences between treatments at  $p < 0.05$  according to Tukey's HSD. P-values of two-way ANOVAs of bacterial, yeast, and their interaction (bacteria × yeast) are indicated  $p < 0.05$ , \*;  $p < 0.01$ , \*\*;  $p < 0.001$ , \*\*\*;  $p < 0.0001$ , \*\*\*\*; ns, not significant. Treatments: non-inoculated soybeans (T1), soybean inoculated with *B. japonicum* (T2), *S. cerevisiae* (T3), *S. exiguus* (T4), *B. japonicum* × *S. cerevisiae* (T5) or *B. japonicum* × *S. exiguus* (T6).

**Table S4.** Differences in the rhizosphere soil N and P concentrations under different treatments. stages under different treatments.

| Treatments       | Rhizosphere soil available N<br>concentration (mg g <sup>-1</sup> ) | Rhizosphere soil available P<br>concentration (mg g <sup>-1</sup> ) |
|------------------|---------------------------------------------------------------------|---------------------------------------------------------------------|
| T1               | 5.52±0.03 <sup>d</sup>                                              | 1.86±0.01 <sup>c</sup>                                              |
| T2               | 6.21±0.05 <sup>a</sup>                                              | 1.73±0.03 <sup>c</sup>                                              |
| T3               | 5.33±0.04 <sup>c</sup>                                              | 2.96±0.03 <sup>b</sup>                                              |
| T4               | 5.31±0.03 <sup>c</sup>                                              | 2.94±0.03 <sup>b</sup>                                              |
| T5               | 5.73±0.04 <sup>b</sup>                                              | 3.21±0.02 <sup>a</sup>                                              |
| T6               | 5.73±0.04 <sup>b</sup>                                              | 3.2±0.02 <sup>a</sup>                                               |
| Bacteria         | ***                                                                 | *                                                                   |
| Yeast            | **                                                                  | ****                                                                |
| Bacteria × yeast | *                                                                   | ****                                                                |

Data (means ± SE, n = 5). P-values of two-way ANOVAs followed by different superscripts denotes significant differences between treatments at  $p < 0.05$  according to Tukey's HSD. P-values of two-way ANOVAs of bacterial, yeast, and their interaction (bacteria × yeast) are indicated  $p < 0.05$ , \*;  $p < 0.01$ , \*\*;  $p < 0.001$ , \*\*\*;  $p < 0.0001$ , \*\*\*\*; ns, not significant. Treatments: non-inoculated soybeans (T1), soybean inoculated with *B. japonicum* (T2), *S. cerevisiae* (T3), *S. exiguus* (T4), *B. japonicum* × *S. cerevisiae* (T5) or *B. japonicum* × *S. exiguus* (T6).

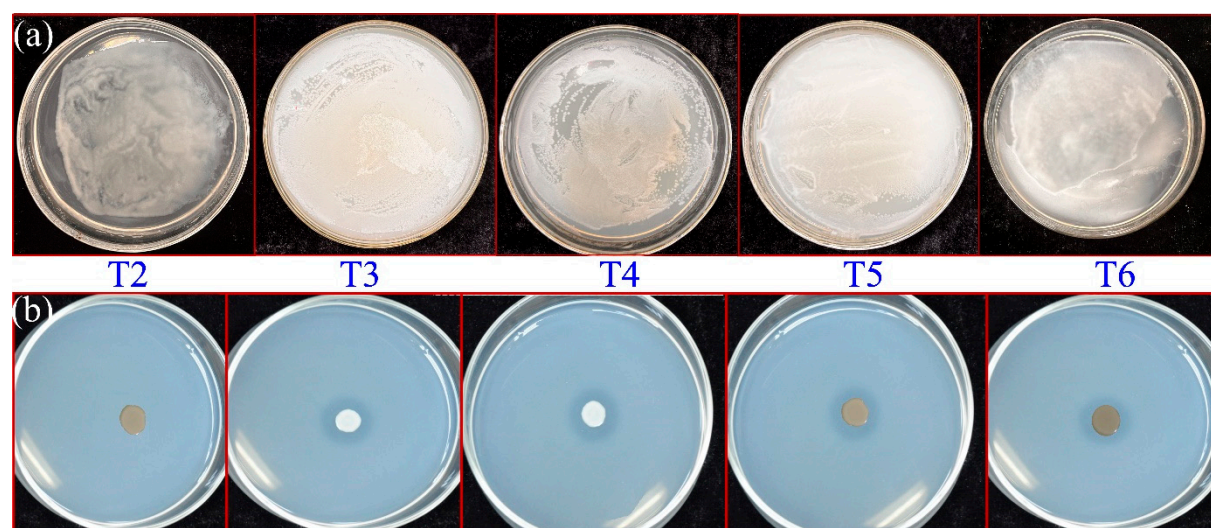

**Figure S1.** In vitro determination of (a) antagonism between bacteria and different yeast isolates, and (b) P solubilization after culturing microbes for 7 days on Pikovskaya's agar medium showing the clear zone of phosphate dissolution. Treatments: non-inoculated soybeans (T1), soybean inoculated with *B. japonicum* (T2), *S. cerevisiae* (T3), *S. exiguus* (T4), *B. japonicum* × *S. cerevisiae* (T5) or *B. japonicum* × *S. exiguus* (T6).

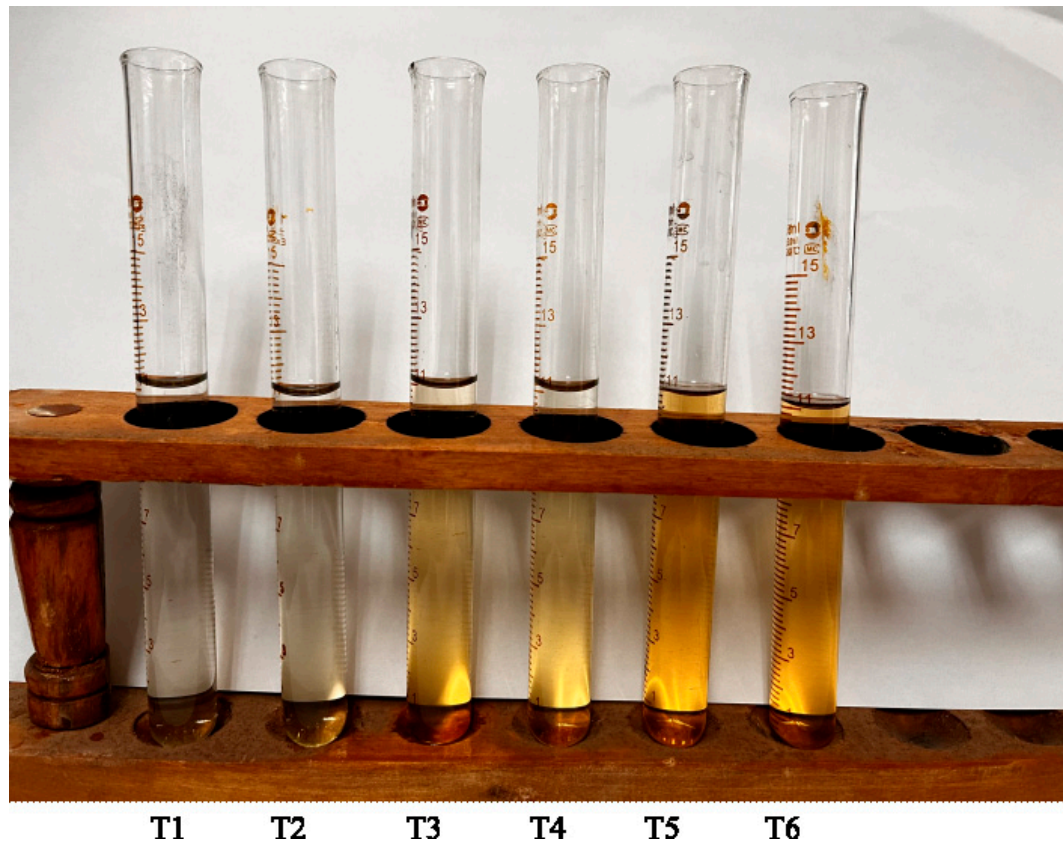

**Figure S2.** In vitro determination of IAA production in liquid media by different microbes. Treatments: non-inoculated soybeans (T1), soybean inoculated with *B. japonicum* (T2), *S. cerevisiae* (T3), *S. exiguus* (T4), *B. japonicum* × *S. cerevisiae* (T5) or *B. japonicum* × *S. exiguus* (T6).

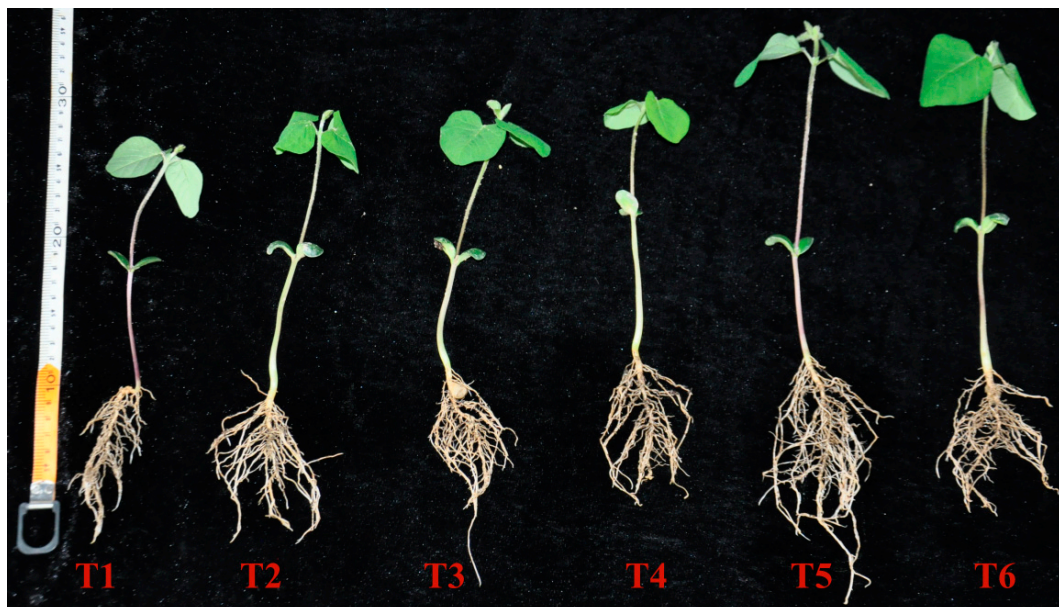

**Figure S3.** Five-day old soybean seedlings germinated under different microbial inoculation treatments. Treatments: non-inoculated soybeans (T1), soybean inoculated with *B. japonicum* (T2), *S. cerevisiae* (T3), *S. exiguus* (T4), *B. japonicum* × *S. cerevisiae* (T5) or *B. japonicum* × *S. exiguus* (T6).
